# Supplementary material
Source: PubMed Central journal article supplement (PMC4674404)
Supplement: supp_187.18.1359_151135-res-1-at.pdf [file supp_187.18.1359_151135-res-1-at.pdf]

Appendix 1 (as supplied by the authors): Narcissistic Personality Index

For each statement indicate whether you believe it is True or False.

1. I have a natural talent for influencing people.True / False
2. Modesty doesn't become me.True / False
3. I would do almost anything on a dare.True / False
4. I know that I am good because everybody keeps telling me so.True / False
5. If I ruled the world it would be a much better place.True / False
6. I can usually talk my way out of anything.True / False
7. I like to be the center of attention.True / False
8. I will be a success.True / False
9. I think I am a special person.True / False
10. I see myself as a good leader.True / False
11. I am assertive.True / False

12. I like to have authority over other people.True / False
13. I find it easy to manipulate people.True / False
14. I insist upon getting the respect that is due me.True / False
15. I like to display my body.True / False
16. I can read people like a book.True / False
17. I like to take responsibility for making decisions.True / False
18. I want to amount to something in the eyes of the world.True / False
19. I like to look at my body.True / False
20. I am apt to show off if I get the chance.True / False
21. I always know what I am doing.True / False
22. I rarely depend on anyone else to get things done.True / False
23. Everybody likes to hear my stories.True / False
24. I expect a great deal from other people.True / False
25. I will never be satisfied until I get all that I deserve.True / False

26. I like to be complimented.True / False
27. I have a strong will to power.True / False
28. I like to start new fads and fashions.True / False
29. I like to look at myself in the mirror.True / False
30. I really like to be the centre of attention.True / False
31. I can live my life in any way I want to.True / False
32. People always seem to recognise my authority.True / False
33. I would prefer to be a leader.True / False
34. I am going to be a great person.True / False
35. I can make anybody believe anything I want them to.True / False
36. I am a born leader.True / False
37. I wish somebody would someday write my biography.True / False

38. I get upset when people don't notice how I look when I go out in public.  
True / False

39. I am more capable than other people. True / False

40. I am an extraordinary person. True / False
