# Supplementary material
Source: PubMed Central journal article supplement (PMC4674404)
Supplement: supp_187.18.1359_151135-res-3-at.pdf [file supp_187.18.1359_151135-res-3-at.pdf]

Appendix 3 (as supplied by the authors): Levenson Self-Report Psychopathy Scale – LSRP

Read each statement and indicate how much you agree with it using the following scale:

1 = disagree strongly; 2 = disagree somewhat; 3 = agree somewhat; 4 = agree strongly

1. Before I do anything, I carefully consider the possible consequences.

1 2 3 4

2. Cheating is not justified because it is unfair to others.

1 2 3 4

3. Even if I were trying very hard to sell something, I wouldn't lie about it.

1 2 3 4

4. For me, what's right is whatever I can get away with.

1 2 3 4

5. I am often bored.

1 2 3 4

6. I don't plan anything very far in advance.

1 2 3 4

7. I enjoy manipulating other people's feelings.

1 2 3 4

8. I feel bad if my words or actions cause someone else to feel emotional pain.

1 2 3 4

9. I find myself in the same kinds of trouble, time after time.

1 2 3 4

10. I find that I am able to pursue one goal for a long time.

1 2 3 4

11. I have been in a lot of shouting matches with other people.

1 2 3 4

12. I let others worry about higher values; my main concern is with the bottom line.

1 2 3 4

13. I make a point of trying not to hurt others in pursuit of my goals.

1 2 3 4

14. I often admire a really clever scam.

1 2 3 4

15. I quickly lose interest in tasks I start.

1 2 3 4

16. I tell other people what they want to hear so that they will do what I want them to do.

1 2 3 4

17. I would be upset if my success came at someone else's expense.

1 2 3 4

18. In today's world, I feel justified in doing anything I can get away with to succeed.

1 2 3 4

19. Looking out for myself is my top priority.

1 2 3 4

20. Love is overrated.

1 2 3 4

21. Making a lot of money is my most important goal.

1 2 3 4

22. Most of my problems are due to the fact that other people just don't understand me.

1 2 3 4

23. My main purpose in life is getting as many goodies as I can.

1 2 3 4

24. People who are stupid enough to get ripped off usually deserve it.

1 2 3 4

25. Success is based on survival of the fittest; I am not concerned about the losers.

1 2 3 4

26. When I get frustrated, I often "let off steam" by blowing my top.

1 2 3 4
